# Supplementary material for: Si3N4whiskers modified with titanium as stable Pt electrocatalyst supports for methanol oxidation and oxygen reduction
Source: Royal Society of Chemistry journal article supplement (doi:10.1039/c4ta03818e), 2014-09-02
Supplement: c4ta03818e1.pdf [file c4ta03818e1.pdf]

## Supporting Information

### **Si<sub>3</sub>N<sub>4</sub> whiskers modified with Titanium as stable Pt electrocatalysts supports for methanol oxidation and oxygen reduction**

Yan Zhang, Jianbing Zang, Liang Dong, Xiaozhe Cheng, Yuling Zhao, Yanhui  
Wang\*

State Key Laboratory of Metastable Materials Science and Technology, College of  
Materials Science and Engineering, Yanshan University, Qinhuangdao 066004, PR  
China

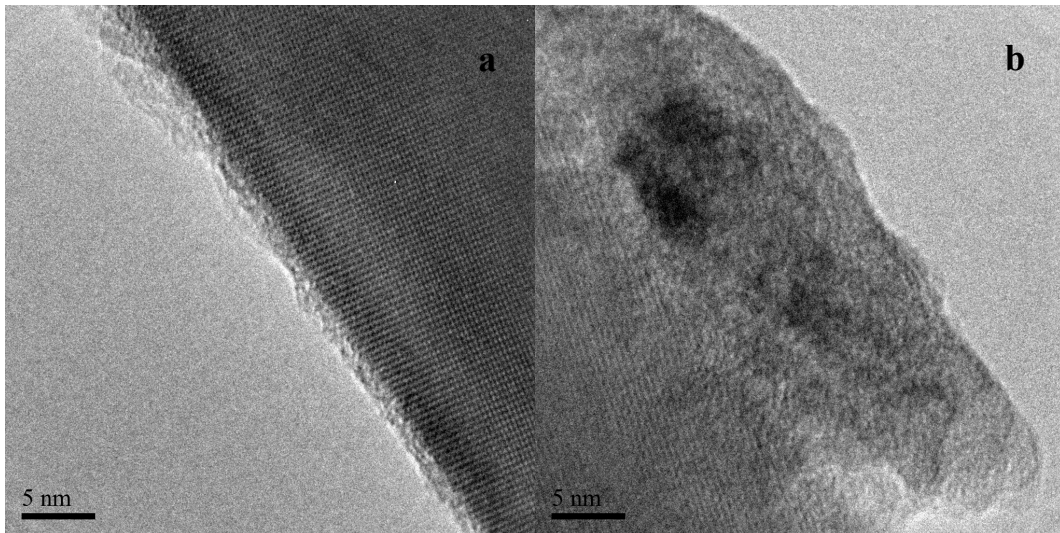

Fig. S1 HRTEM images of Ti/Si<sub>3</sub>N<sub>4</sub> (a, b).

As shown in the Fig. S1a, uniformly nanoscale coating was formed over the Si<sub>3</sub>N<sub>4</sub> whisker after the one-pot deposition process. The coating was continuous with particles as shown in the Fig. S1a. A clearer image of the particles showed in the Fig. S1b.

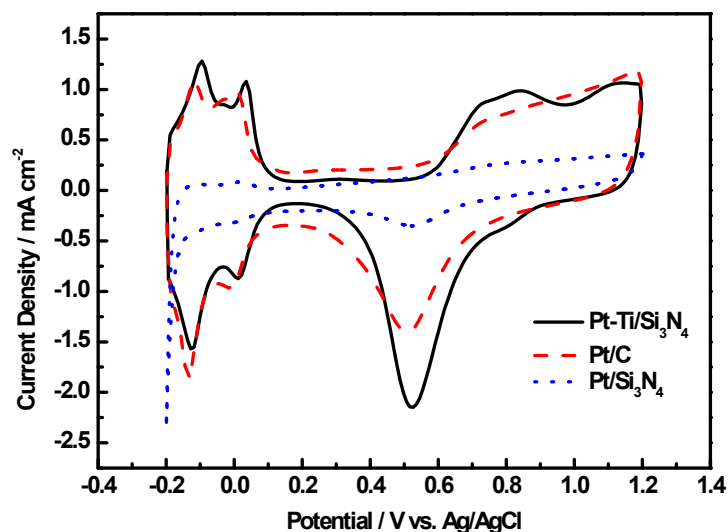

Fig. S2 CVs of Pt-Ti/Si<sub>3</sub>N<sub>4</sub>, Pt/C and Pt/Si<sub>3</sub>N<sub>4</sub> electrocatalysts tested in 0.5 M H<sub>2</sub>SO<sub>4</sub> at a scan rate of 50 mV s<sup>-1</sup>.

As shown in Fig. S2, the CVs exhibited adsorption-desorption peaks of hydrogen from the surface of Pt between -0.2 to 0.1 V (vs. Ag/AgCl). The ECSA of the electrocatalysts can be calculated by integrating the charge collected in the hydrogen adsorption/desorption region after double-layer correction, and normalizing the integrated values with the scan rate, Pt loading, and the charge value of 210  $\mu\text{C cm}^{-2}$  for the adsorption of a hydrogen monolayer. The ECSA value of the Pt-Ti/Si<sub>3</sub>N<sub>4</sub> (70.50 m<sup>2</sup> g<sup>-1</sup>) electrocatalysts was greater than that of the Pt/C (58.67 m<sup>2</sup> g<sup>-1</sup>) and Pt/Si<sub>3</sub>N<sub>4</sub> (8.83 m<sup>2</sup> g<sup>-1</sup>) electrocatalysts.

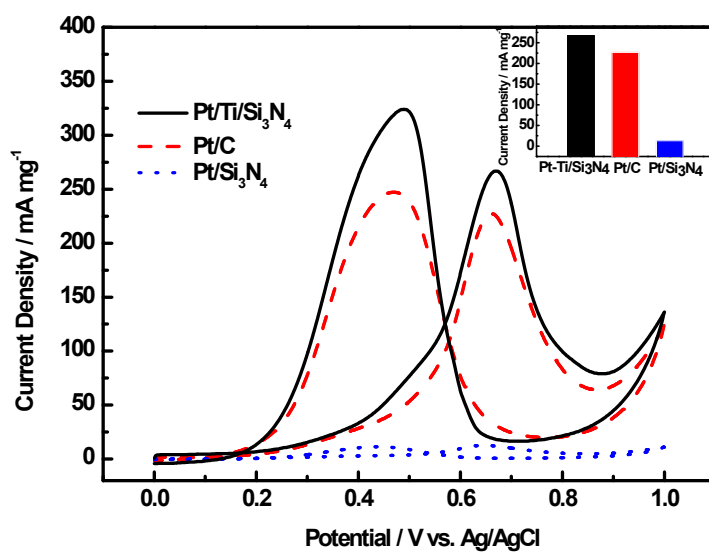

Fig. S3 CVs of Pt-Ti/Si<sub>3</sub>N<sub>4</sub>, Pt/C and Pt/Si<sub>3</sub>N<sub>4</sub> electrocatalysts tested in 1.0 M CH<sub>3</sub>OH + 0.5 M H<sub>2</sub>SO<sub>4</sub> at a scan rate of 50 mV s<sup>-1</sup>; The inset shows the mass-normalized current density.

As shown in Fig. S3, the Pt-Ti/Si<sub>3</sub>N<sub>4</sub> (267.35 mA mg<sup>-1</sup>) showed the highest mass-normalized current density at peak potential that was obviously higher than that on the Pt/C (226.70 mA mg<sup>-1</sup>) and Pt/Si<sub>3</sub>N<sub>4</sub> (12.96 mA mg<sup>-1</sup>).

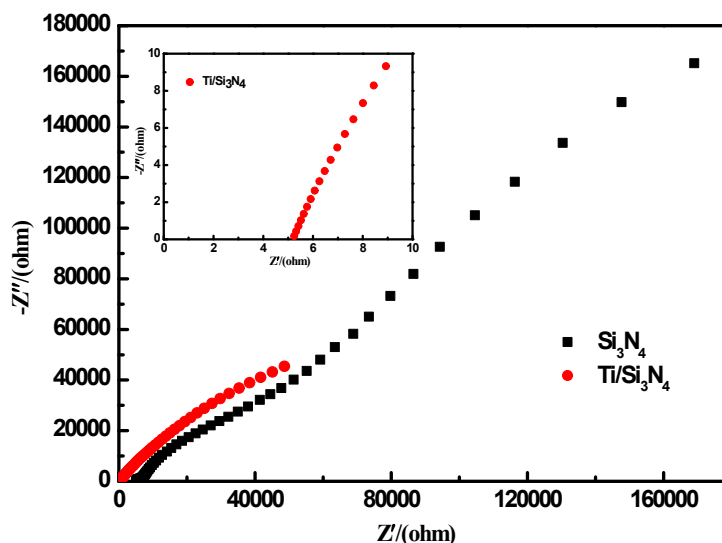

Fig. S4 Nyquist plots of the experimental impedance data the pristine Si<sub>3</sub>N<sub>4</sub> and Ti/Si<sub>3</sub>N<sub>4</sub> in 0.5 M H<sub>2</sub>SO<sub>4</sub> solution measured in the range of 10 mHz to 100 kHz with a 5 mV amplitude.

We measured the electrochemical impedance spectra of the pristine Si<sub>3</sub>N<sub>4</sub> and Ti/Si<sub>3</sub>N<sub>4</sub> through the powder electrode. A piece of platinum wire (0.1 mm in diameter) was sealed in a small pipette and a small cavity was left at the tip (0.5 mm in diameter). The cavity was filled with powder by grinding the tip on a glass slide over which the powder was spread about 1.5mm in depth.

The impedance spectra for the Si<sub>3</sub>N<sub>4</sub> and Ti/Si<sub>3</sub>N<sub>4</sub> tested in the frequency range of 10 mHz to 100 kHz at the open circuit potential with a 5 mV amplitude in 0.5 M H<sub>2</sub>SO<sub>4</sub> are shown in Fig. S4. It can be seen that the internal resistance of Ti/Si<sub>3</sub>N<sub>4</sub> (5.22 Ω) is smaller than that of Si<sub>3</sub>N<sub>4</sub> (5.19 kΩ), which suggests that the Ti/Si<sub>3</sub>N<sub>4</sub> electrode has better conductive properties and consequent electrochemical properties.

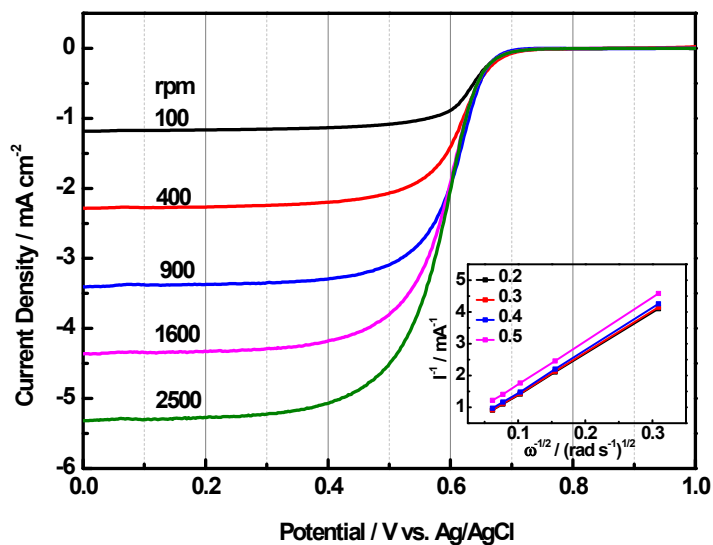

Fig. S5 LSVs of Pt/C electrocatalysts on the RDE at different rotation rates in the O<sub>2</sub>-saturated 0.5 M H<sub>2</sub>SO<sub>4</sub> solution (scan rate: 10 mV s<sup>-1</sup>); the inset shows K–L curves.

The LSVs of the Pt/C electrocatalysts tested on the RDE at different rotation rates sweep from 1.0 to 0.1 V (vs. Ag/AgCl) at the scan rate of 10 mV s<sup>-1</sup> in the O<sub>2</sub>-saturated 0.5 M H<sub>2</sub>SO<sub>4</sub> solution. The slopes remain approximately constant over the potential between 0.2 and 0.5 V vs. Ag/AgCl. The average number of electrons transferred (*n*) for ORR on Pt/C can be estimated on the basis of the K–L equation was 3.82.

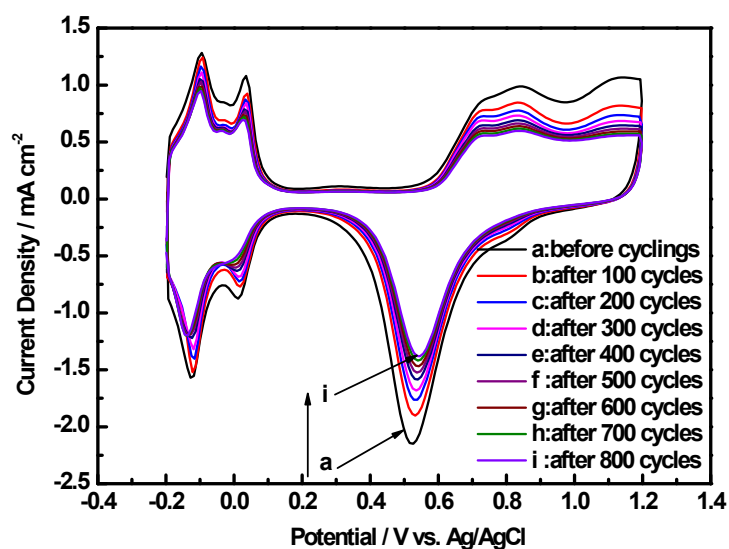

Fig. S6 CV curve of Pt-Ti/Si<sub>3</sub>N<sub>4</sub> electrocatalysts recorded in 0.5 M H<sub>2</sub>SO<sub>4</sub> between -0.2 and 1.2 V (vs. Ag/AgCl) with a 50 mV s<sup>-1</sup> sweep rate at room temperature, the currents were normalized by the geometric electrode area (0.19 cm<sup>2</sup>).

Fig. S6 shows the CVs of the Pt-Ti/Si<sub>3</sub>N<sub>4</sub> electrocatalysts before and after 800 cycles. After 800 cycles, the ECSA of the Pt-Ti/Si<sub>3</sub>N<sub>4</sub> retained 72.85%, indicating an excellent stability of the Pt-Ti/Si<sub>3</sub>N<sub>4</sub>.

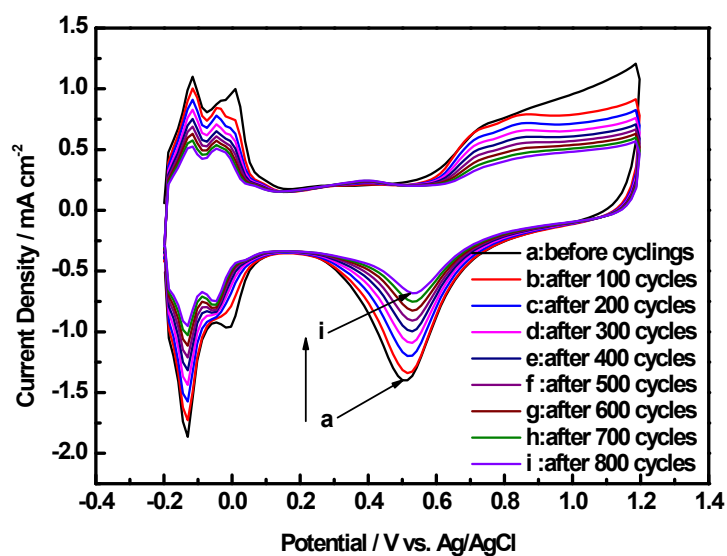

Fig. S7 CV curve of Pt/C electrocatalysts recorded in 0.5 M H<sub>2</sub>SO<sub>4</sub> between -0.2 and 1.2 V (vs. Ag/AgCl) with a 50 mV s<sup>-1</sup> sweep rate at room temperature, the currents were normalized by the geometric electrode area (0.19 cm<sup>2</sup>).

Fig. S7 shows the CVs of the Pt/C electrocatalysts before and after 800 cycles in 0.5 M H<sub>2</sub>SO<sub>4</sub> between -0.2 and 1.2 V (vs. Ag/AgCl). After the 800 cycles, the ECSA of the Pt/C retained only 42.23%.



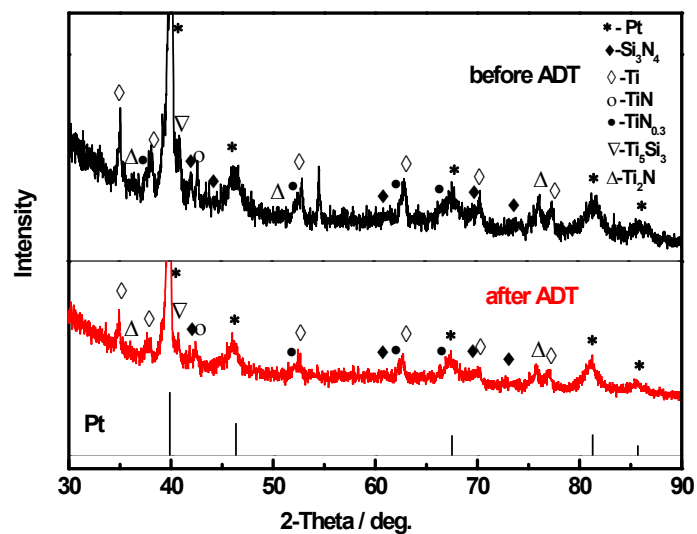

Fig. S8 XRD patterns of Pt-Ti/Si<sub>3</sub>N<sub>4</sub> before and after the ADT test.

As shown in Fig. S8, the XRD pattern of Pt-Ti/Si<sub>3</sub>N<sub>4</sub> showed no obvious change of the phase as well as the size of the Pt particles after the test, which consistent with the results of electrochemical. In other words, the Pt-Ti/Si<sub>3</sub>N<sub>4</sub> electrocatalyst had outstanding stability during the test.

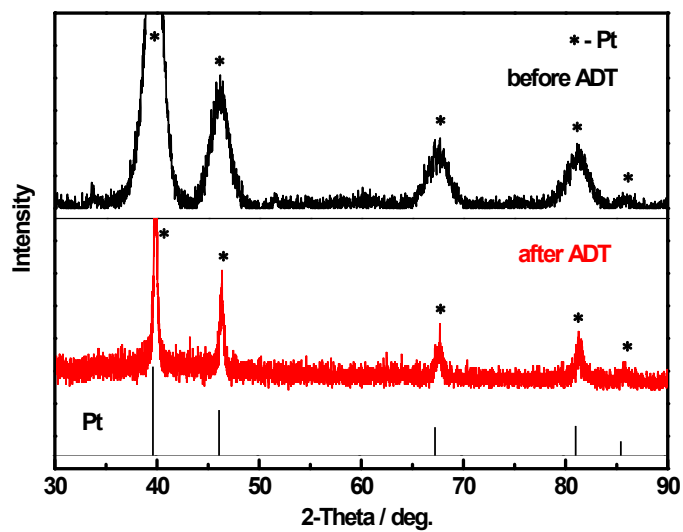

Fig. S9 XRD patterns of Pt /C before and after the ADT test.

The size of the Pt particles of Pt/C increased obviously from 4.67 nm to 26.12 nm (calculated via the Scherrer equation) as shown in the Fig. S9, which consistent with the results of electrochemical test.
